# Supplementary material
Source: publisher figshare collection journal article supplement (https://sage.figshare.com/ndownloader/files/18667064)
Supplement: Supplementary file 1 [file 18667064]

## Supplementary material

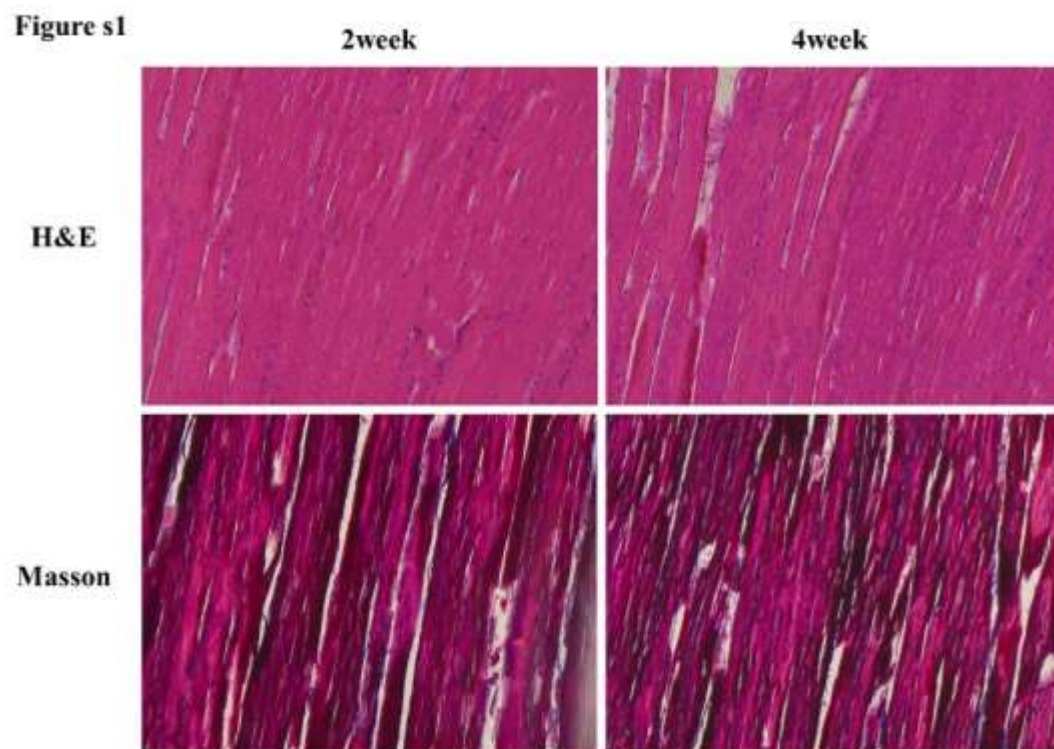

H&E and Masson staining of normal skeletal muscle tissue of 6 to 8-week-old SD rat. 200X.

Figure s2

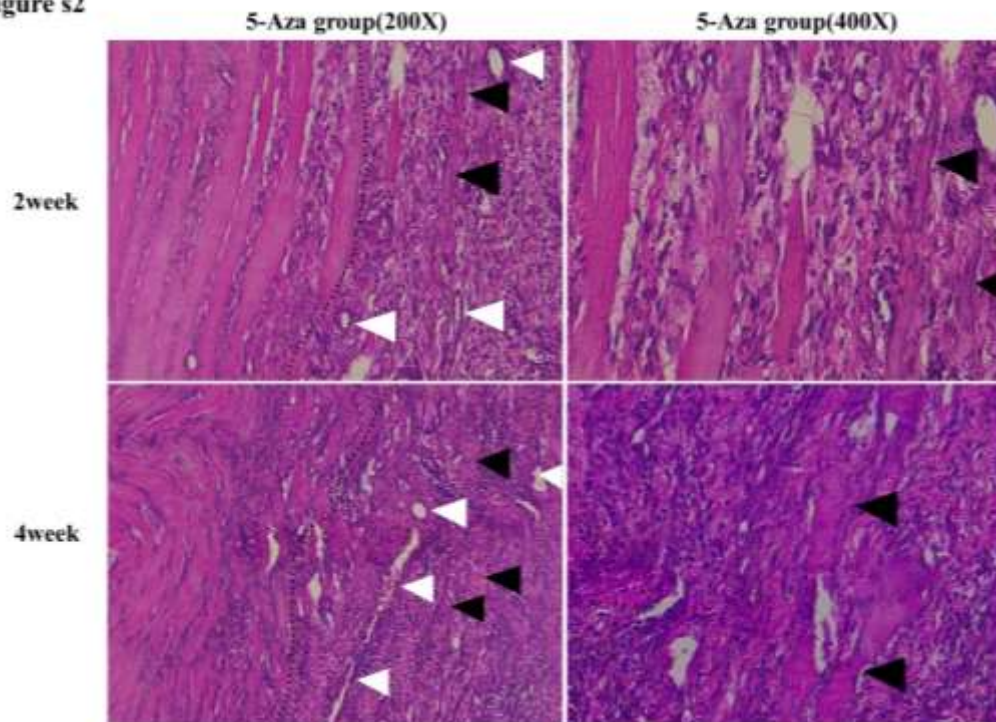

H&E staining of 2 and 4 weeks after implantation of GelMA+5-Aza-induced hAMCs (5-Aza group). The dotted line is the boundary between normal muscle tissue and defect in 200X images. White arrow shows the neovascularization, black arrow shows fused hAMCs. The multi-nucleation fiber tissue were indicated by black arrow in 400X images.

**Figure s3**

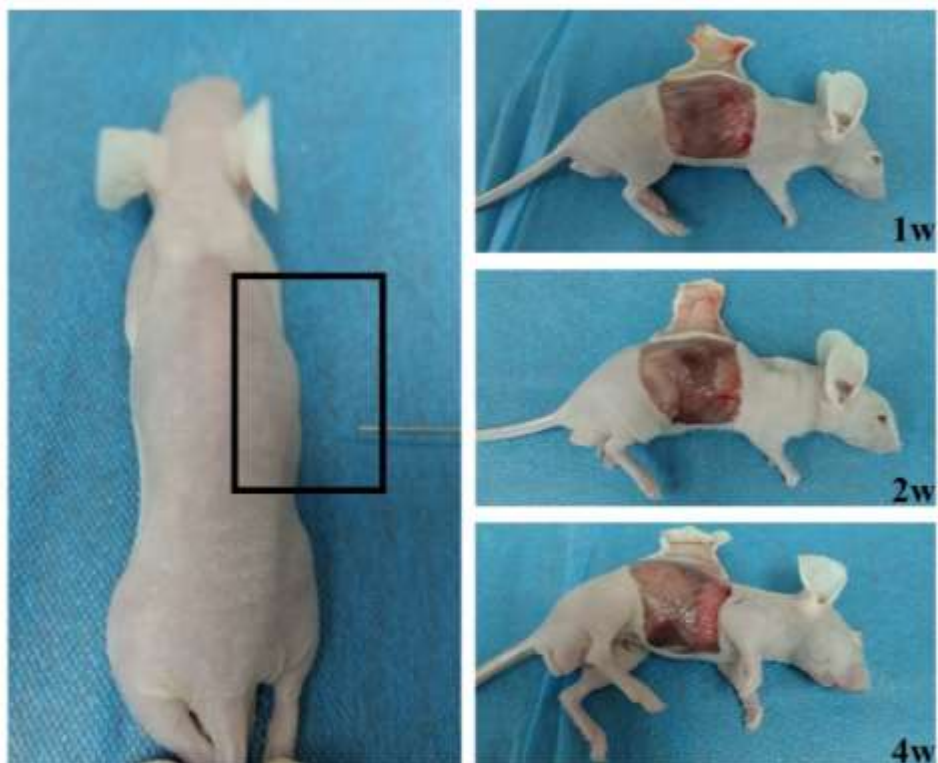

Low immunogenicity and low carcinogenicity of hAMCs. Following injection with hAMCs were injected under the skin of 6 to 8-week-old male nude mice.

Figure s4

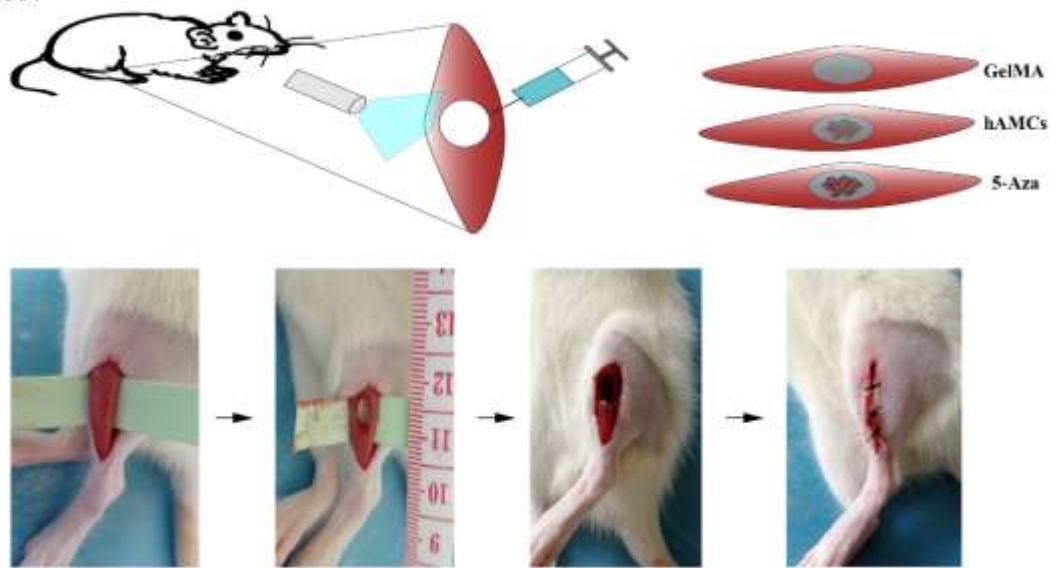

Manufacturing schematic of VML model and actual operation process.
